# Supplementary material for: Switching between halogen- and hydrogen-bonding in stoichiometric variations of a cocrystal of a phosphine oxide
Source: Royal Society of Chemistry journal article supplement (doi:10.1039/c2ce25653c), 2012-01-01
Supplement: c2ce25653c.pdf [file c2ce25653c.pdf]

# Supplementary Material

## Switching between halogen- and hydrogen-bonding in stoichiometric modifications of a cocrystal of a phosphine oxide

Se Ye Oh, Christopher W. Nickels, Felipe Garcia, William Jones\* and Tomislav Friščić\*

|                                                                                                                  |   |
|------------------------------------------------------------------------------------------------------------------|---|
| <b>Experimental details</b>                                                                                      | 1 |
| <b>Figure S1.</b> DSC thermogram of ( <b>mdppo</b> )·( <b>tfib</b> ) collected on 14.6 mg of sample              | 2 |
| <b>Figure S2.</b> DSC thermogram of ( <b>mdppo</b> )·( <b>tfib</b> ) collected on 8.4 mg of sample               | 2 |
| <b>Figure S3.</b> DSC thermogram of ( <b>mdppo</b> )·( <b>tfib</b> ) collected on 4.8 mg of sample               | 3 |
| <b>Figure S4.</b> DSC thermogram of ( <b>mdppo</b> ) <sub>2</sub> ·( <b>tfbb</b> ) collected on 3.6 mg of sample | 3 |
| <b>Figure S5.</b> DSC thermogram of ( <b>mdppo</b> ) <sub>2</sub> ·( <b>tfib</b> ) collected on 4.6 mg of sample | 4 |
| <b>Figure S6.</b> FTIR-ATR spectra of selected samples                                                           | 4 |

### Experimental details

**Mechanochemical LAG screening** Mechanochemical experiments were conducted in a Retsch MM400 mixer mill. For each experiment, the mixture of reactants in an appropriate stoichiometric ratio (200 mg total weight) was placed in a 10 mL stainless steel grinding jar along with two stainless steel balls of 7 mm diameter. The reaction mixture was then milled for 30 minutes at a frequency of 30 Hz. The samples were then analysed using powder X-ray diffraction, FTIR-ATR as well as DSC.

**Powder X-ray diffraction (PXRD)** Room temperature PXRD patterns were collected either on a Bruker D8 Discovery X-ray diffractometer using a Cu-K $\alpha$  ( $\lambda=1.54$  Å) source, equipped with a Vantech area detector and a nickel filter (McGill University) or on a Philips X'Pert Pro diffractometer, equipped with an X'celerator RTMS detector, using Ni-filtered CuK $\alpha$  radiation, using a flat plate configuration (University of Cambridge). In all cases the X-ray tube was operated at 40 kV and 40 mA and data analysis was carried out using the Panalytical X'pert Highscore Plus program

**Single crystal diffraction** Single crystal diffraction data were collected on a Nonius Kappa CCD diffractometer equipped with a graphite monochromator and an Oxford cryostream, using MoK $\alpha$  radiation. Structure solution and refinement was performed using SHELX available with the WinGX package of crystallographic tools, running on a Pentium-based PC under MS Windows XP.

**Infrared Spectroscopy** Fourier transform infrared spectra were collected using a Perkin Elmer Fourier Transform-Infrared Attenuated Total Reflection spectrometer in the range 400 cm<sup>-1</sup> to 4000 cm<sup>-1</sup>.

**Differential Scanning Calorimetry (DSC)** DSC measurements were conducted either on a TA Instruments Q1000 Differential Scanning Calorimeter with a standard aluminum pan of 40  $\mu$ L volume and nitrogen flow rate set at 50 ml/min (McGill University) or on a Mettler DSC30 instrument (University of Cambridge) in aluminum pans of 40  $\mu$ L volume.

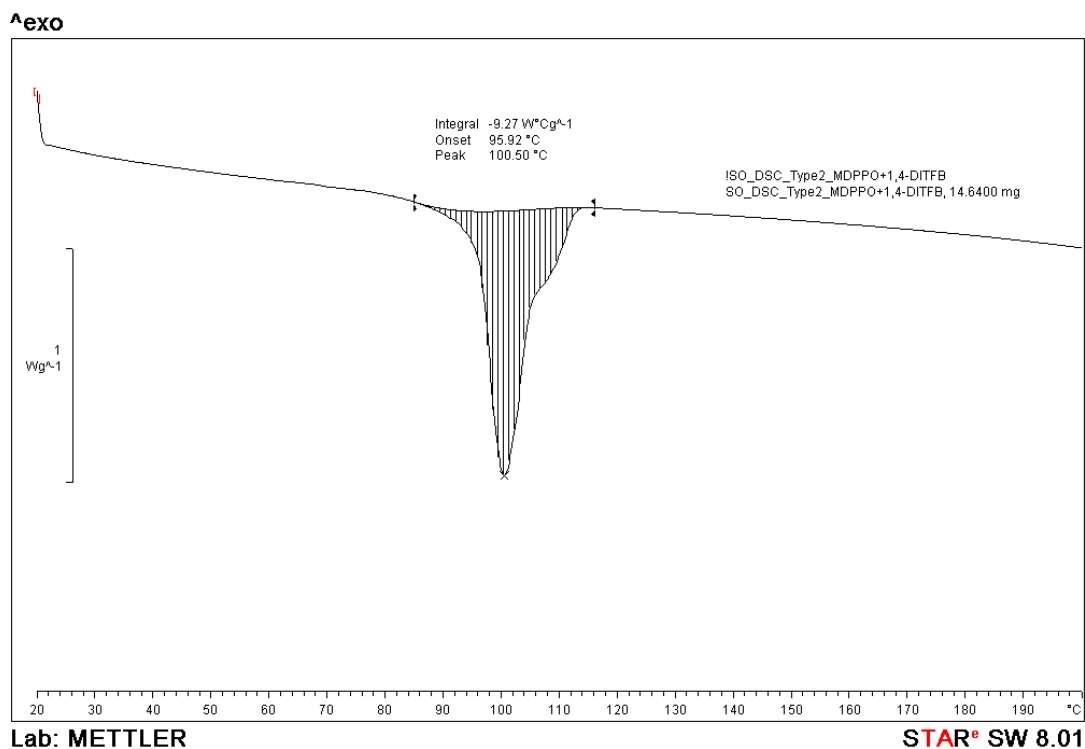

**Figure S1.** DSC thermogram of (mdppo)·(tfib) collected on 14.6 mg of sample in a dynamic flow of nitrogen, heating rate 10 K min<sup>-1</sup>

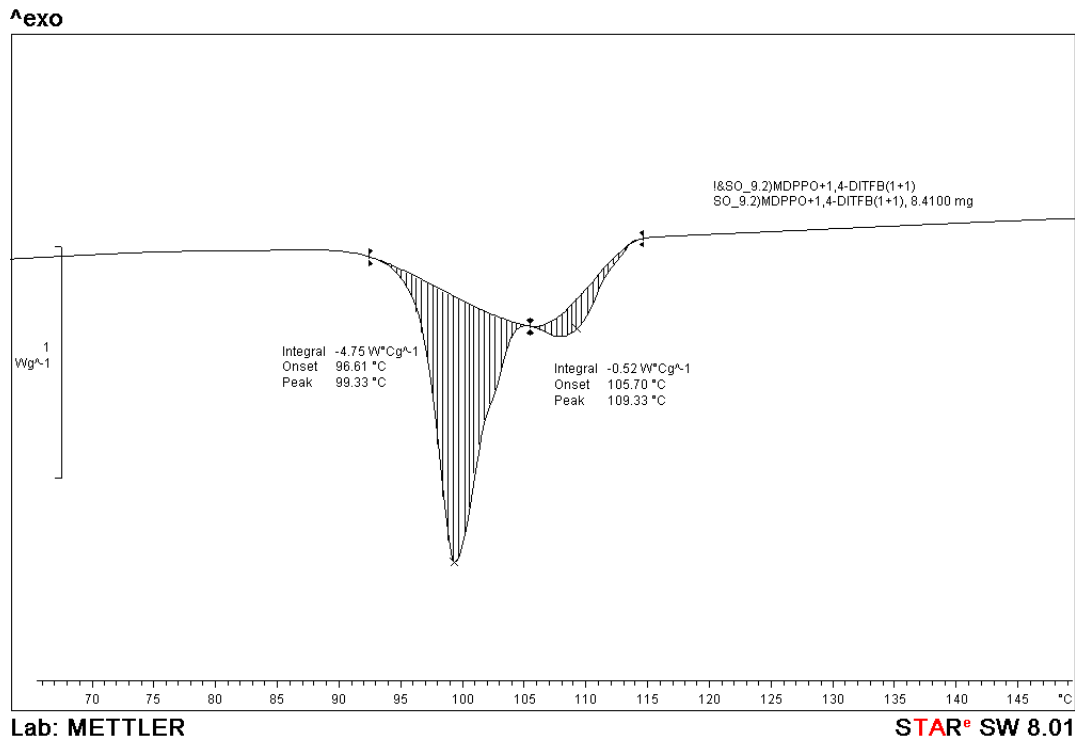

**Figure S2.** DSC thermogram of (mdppo)·(tfib) collected on 8.4 mg of sample in a dynamic flow of nitrogen, heating rate 10 K min<sup>-1</sup>.

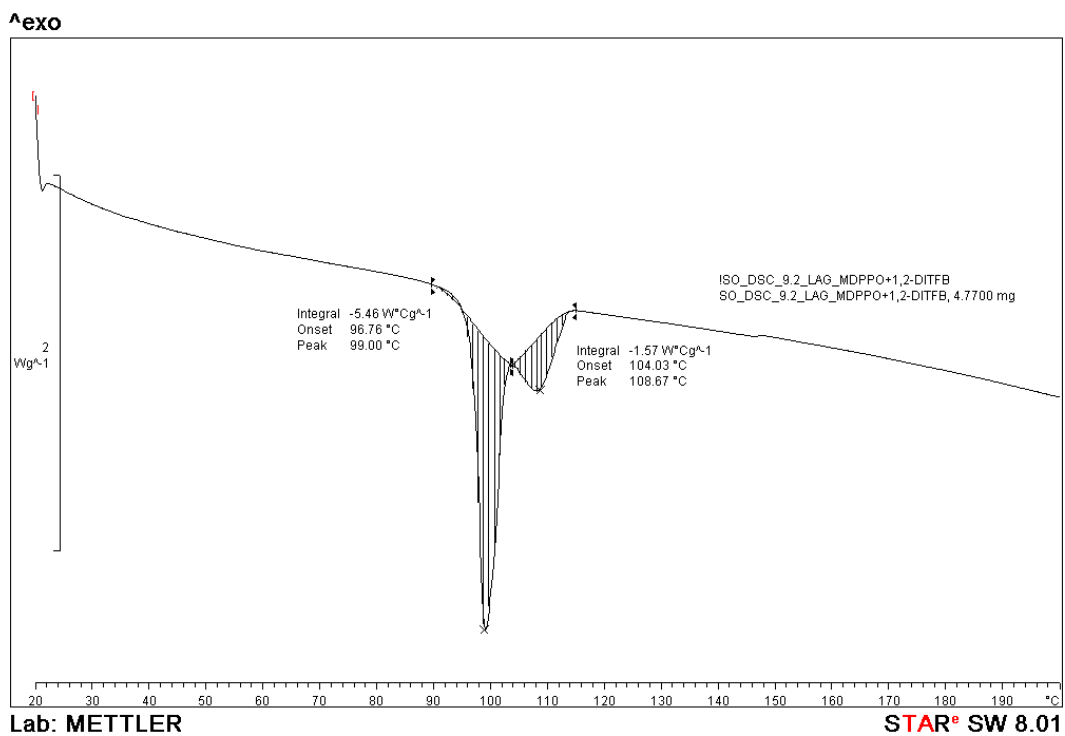

**Figure S3.** DSC thermogram of **(mdppo)·(tfib)** collected on 4.8 mg of sample in a dynamic flow of nitrogen, heating rate 10 K min<sup>-1</sup>.

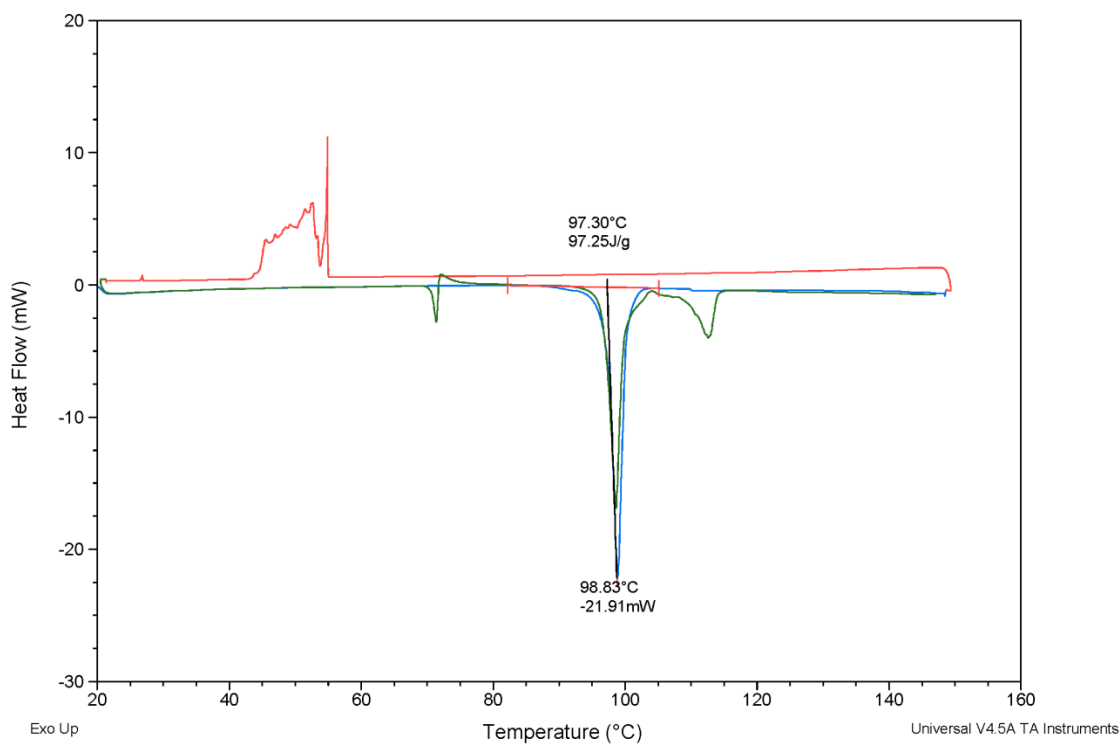

**Figure S4.** DSC thermogram of **(mdppo)<sub>2</sub>·(tfib)** collected on 3.6 mg of sample in a dynamic flow of nitrogen. The sample was heated (blue line), cooled (red line) and then heated again (green line) at a rate 10 K min<sup>-1</sup>.

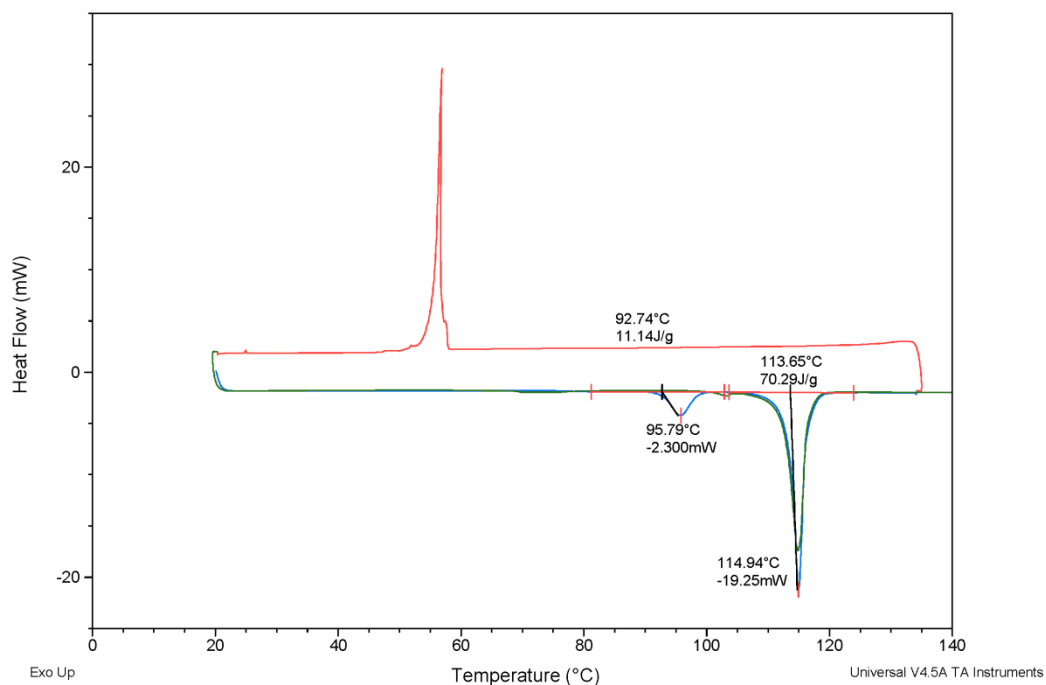

**Figure S5.** DSC thermogram of  $(\text{mdppo})_2 \cdot (\text{tfib})$  collected on 4.6 mg of sample in a dynamic flow of nitrogen. The sample was heated (blue line), cooled (red line) and then heated again (green line) at a rate  $10 \text{ K min}^{-1}$ .

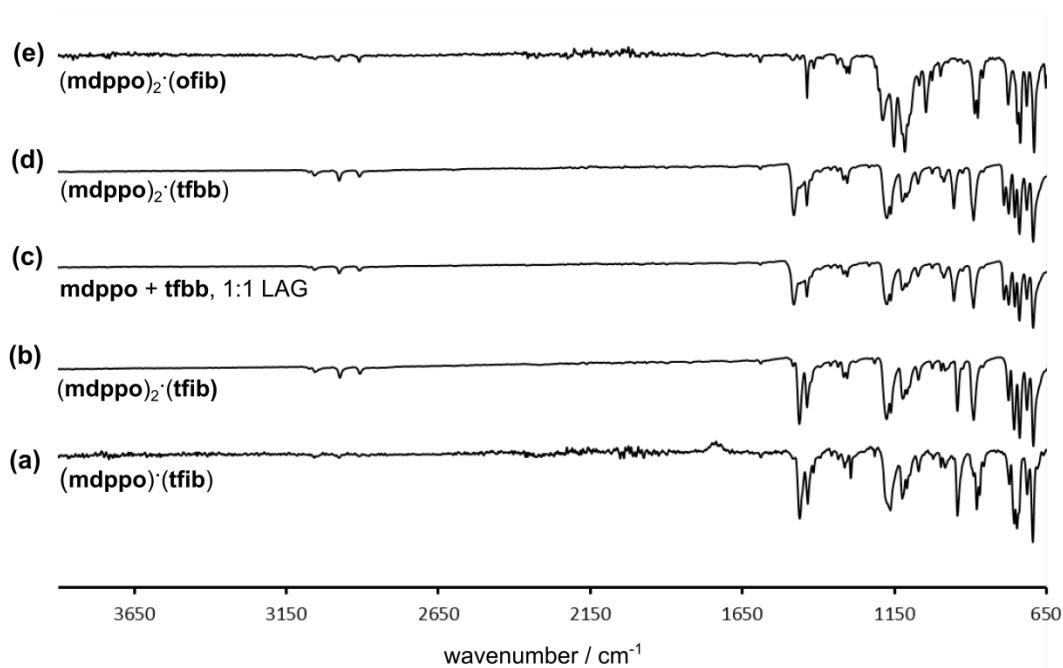

**Figure S6.** FTIR-ATR spectra of: (a)  $(\text{mdppo}) \cdot (\text{tfib})$  cocrystal prepared by LAG; (b)  $(\text{mdppo})_2 \cdot (\text{tfib})$  cocrystal prepared by LAG; (c) 1:1 mixture of  $\text{mdppo}$  and  $\text{tfbb}$  after LAG with acetonitrile; (d)  $(\text{mdppo})_2 \cdot (\text{tfbb})$  cocrystal prepared by LAG and (e)  $(\text{mdppo})_2 \cdot (\text{ofib})$  cocrystal prepared by grinding.
